# Supplementary material
Source: publisher figshare collection journal article supplement (https://karger.figshare.com/ndownloader/files/12499436)
Supplement: Supplementary file 1 [file 12499436]

Supplemental Table 1. Comments on the suggested additional locations for ring-tailed lemurs (*Lemur catta*) as presented by Murphy *et al*. [2017].

| **Location No.** | **Citation** | **Locality** | **Source** | **Response** | **Comment** |
| --- | --- | --- | --- | --- | --- |
| 1 | a | Ankotapiky  (Mikea) | Ganzhorn & Randriamanalina 2004 | Refers to pets | Ganzhorn & Randriamanalina (2004) refer to pet ring-tailed lemurs for this location (p. 90). The following is a translation of the original French sentence which appears in Ganzhorn & Randriamanalina (2004): "*L. catta* had been brought to the camp at Maharihy by a villager who wanted to sell it. In addition, we have seen *L. catta* domesticated by Ankindranoky." |
| 2 | a | Abrahama-Jiloriaky (Mikea) | Ganzhorn & Randriamanalina 2004 | No count data available | Ganzhorn & Randriamanalina (2004), *Lemur catta* heard but not seen on one transect of six (Table 8-2). No count data for number of animals. |
| 3 | a | Middle Mangoky 1 | Ravoahangy et al 2008 | No count data available | Ravoahangy *et al*. (2008) note *Lemur catta* as "Rare" (Table 1) for Middle Mangoky, without providing a count. There is no reference to Middle Makongy 1 and 2, as has been suggested by Murphy *et al*. (2017). |
| 4 | a | Middle Mangoky 2 | Ravoahangy et al 2008 | No count data available | See comment for location 3. |
| 5 | a | Manombo | Gardner et al 2009 | No count data available | LaFleur *et al*. (2017) included as part of PK-32-Ranobe. Gardner and Davies (2014) state that the species "no longer exists" in the PK-32 area (p. 10; Table 1). Gardner et al. (2009) note four individual *Lemur catta* in the entire PK-32 area (although they point out that this does not constitute extirpation); however, according to the criteria of LaFleur *et al*. (2017) four individuals is locally or near locally extinct. Moreover, as we aimed to use the most recently published information (i.e. Gardner and Davies, 2014), we ascertained that ring-tailed lemurs are no longer present. |
| 6 | a | Fiherenana | Gardner et al. 2009 | Location included | See comment for location 5. |
| 7 | a | Analavelona | Ravoahangy et al. 2008 | No count data available | Ravoahangy *et al*. (2008) (Table 1); Analavelona comment "groups contain between 2-5 individuals." We cannot know how many animals this was referring to and have not included these in our count. |
| 8 | a | Lavenombato | C. Gardner & L. Jasper pers. obs. | Unpublished personal observation with no date or data |  |
| 9 | a | Antafoky | Emmett et al. 2003 | Location included | Discussion of Sept Lacs Region included in Gould and Sauther (2016), pg. 97, paragraph 1. |
| 10 | a | Manderano | Emmett et al. 2003 | Location included | See comment for location 9. |
| 11 | a | Sept Lacs | Emmett et al. 2003 | Location included | See comment for location 9. |
|  | b | Sept Lacs | C. Gardner & L. Jasper pers. Obs. | Unpublished personal observation with no date or data |  |
| 12 | a | Ranomay | C. Gardner & L. Jasper pers. obs. | Unpublished personal observation with no date or data |  |
| 13 | a | Vombositse | Ralison 2008 | Location included | Newer information is presented for this location in LaFleur *et al*. (2017) |
| 14 | a | Antabore  (Itampolo) | Ralison 2008 | Location included | LaFleur *et al*. (2017) have included sub-populations of ring-tailed lemurs at in both the northern and southern ranges of the of Tsimanampesotse National Park. |
|  | b | Antabore  (Itampolo) | Raselimanana et al. 2005 | Location included | See comment for location 14a. |
| 15 | a | Tongaenoro (Itampolo) | Ralison 2008 | No count data available | Ralison (2008), (Table 6-17); "outside the transect". |
|  | b | Tongaenoro (Itampolo) | Raselimanana et al. 2005 | No information about this location located in citation | We cannot find reference to this location in Raselimanana et al. (2005). |
| 16 | a | Vohindefo | L. Jasper pers. obs. | Unpublished personal observation with no date or data |  |
| 17 | a | Ankirikiriky Village (Marolinta) | B. Ferguson pers. obs. | Unpublished personal observation with no date or data | Lemurs seen in village settings are highly likely to be pets and not indicative of populations. |
| 18 | a | Ankirikiriky Sacred Forest  (Marolinta) | B. Ferguson pers. obs. | Unpublished personal observation with no date or data |  |
| 19 | a | Main Road near Tsimilofo  (Beloha) | B. Ferguson pers. obs. | Unpublished personal observation with no date or data | Lemur on a main road could be a pet; not indicative of a population. |
| 20 | a | Vohipary (Andalatanosy) | B. Ferguson pers. obs. | Unpublished personal observation with no date or data |  |
|  | b | Vohipary (Andalatanosy) | Sterman (2012) | Unpublished report: grey literature |  |
| 21 | a | Vohitrosy, Elonty (Dadabe Matory) | B. Ferguson pers. obs. | Unpublished personal observation with no date or data |  |
| 22 | a | Besakoa Ambany (Mahaly) | B. Ferguson pers. obs. | Unpublished personal observation with no date or data |  |
| 23 | a | Vohidava North (Anadabolava) | B. Ferguson pers. obs. | Unpublished personal observation with no date or data |  |
| 24 | a | Anadabolava 1 | Ravoahangy et al 2008 | No count data available | Ravoahangy *et al*. (2008), (Table 1); Anadabolava comment for *Lemur catta* says "Nocturnal studies are very difficult due to Dahalo (cattle rustlers) who live in the forest." This comment was likely meant for another one of the species listed, but we cannot be sure. Also, Murphy et al. [2017] note Anadabolava 1 and Anadabolava 2, but this is not listed as such by Ravoahangy *et al*. [2008]. |
| 25 | a | Anadabolava 2 | Ravoahangy et al 2008 | No count data available | See comment for location 24. |
| 26 | a | Mitakeba Village (Imanombo) | B. Ferguson pers. obs. | Unpublished personal observation with no date or data | Lemurs seen in village settings are highly likely to be pets and not indicative of populations. |
| 27 | a | Vohitsiombe West (Kapila) | B. Ferguson pers. obs. | Unpublished personal observation with no date or data |  |
|  | b | Vohitsiombe West (Kapila) | Sass (2011) | Unpublished report: grey literature |  |
| 28 | a | Vohitsiombe East (Ebelo) | B. Ferguson pers. obs. | Unpublished personal observation with no date or data |  |
| 29 | a | Betenina Andranobe (Tranomaro) | B. Ferguson pers. obs. | Unpublished personal observation with no date or data |  |
| 30 | a | Angavo East (Antanimora) | Rowland et al (2011) | Unpublished report: grey literature |  |
| 31 | a | Angavo South West 1 (Antanimora) | Rowland et al (2011) | Unpublished report: grey literature |  |
| 32 | a | Angavo South West 2 (Antanimora) | Rowland et al (2011) | Unpublished report: grey literature |  |
| 33 | a | Kobokara  (Ifotaka) | B. Ferguson pers. obs. | Unpublished personal observation with no date or data |  |
|  | b | Kobokara  (Ifotaka) | Scherz et al (2012) | Unpublished report: grey literature |  |
| 34 | a | Ankazonampingaratse (Mahabo) | B. Ferguson pers. obs. | Unpublished personal observation with no date or data |  |
| 35 | a | Befinenetse (Ifotaka) | B. Ferguson pers. obs. | Unpublished personal observation with no date or data |  |
| 36 | a | Anjatsikolo Vohimamy (Ifotaka) | B. Ferguson pers. obs. | Unpublished personal observation with no date or data |  |
| 37 | a | Zanavo (Ifotaka) | B. Ferguson pers. obs. | Unpublished personal observation with no date or data |  |
| 38 | a | Ambolihena  (Ifotaka) | B. Ferguson pers. obs. | Unpublished personal observation with no date or data |  |
| 39 | a | Betamboro  (Ifotaka SW) | King et al (2011) | Unpublished report: grey literature |  |
| 40 | a | Behira  (Bebarimo) | B. Ferguson pers. obs. | Unpublished personal observation with no date or data |  |
| 41 | a | Vohondava (Tranomaro) | Ralison 2008 | No count data available | Ralison (2008), (Table 6-18)(S19) Murphy *et al*. (2017) provide encounter rates (ind/km) and approximate densities (ind/km2) of animals, but not counts of individuals or area of land surveyed. |
|  | b | Vohondava (Tranomaro) | Raselimanana et al. 2005 | Unpublished report: grey literature |  |
| 42 | a | Ampiaky Tsilamaha (Tranomaro) | B. Ferguson pers. obs. | Unpublished personal observation with no date or data |  |
| 43 | a | Bevia Gallery Forest (Behara) | Denton 2003 | Unpublished report: grey literature |  |
| 44 | a | Bevia Spiny Forest (Behara) | Denton 2003 | Unpublished report: grey literature |  |
| 45 | a | Ankodida  (Amboasary Sud) | Gardner et al. 2008 | No count data available |  |
|  | b | Ankodida  (Amboasary Sud) | B. Ferguson pers. obs. | Unpublished report: grey literature |  |
